# Supplementary material for: Whole exome and targeted deep sequencing identify genome-wide allelic loss and frequent SETDB1 mutations in malignant pleural mesotheliomas
Source: PubMed Central journal article supplement (PMC4884995; doi:10.18632/oncotarget.7032), 2016-01-27
Supplement: oncotarget-07-8321-s001.pdf [file oncotarget-07-8321-s001.pdf]

**SUPPLEMENTARY TABLE****Supplementary Table S1: Summary of clinical data for 69 MPM patients**

|                       | All   | <i>SETDB1</i> wild-type | <i>SETDB1</i> mutant |
|-----------------------|-------|-------------------------|----------------------|
| Number of patients    | 69    | 62                      | 7                    |
| Mean Age              | 67.2  | 67.5                    | 63.7                 |
| Sex, % Male           | 73.9% | 75.8%                   | 57.1%                |
| Race                  |       |                         |                      |
| Caucasian             | 83.6% | 85%                     | 71.4%                |
| Latino                | 9.0%  | 6.7%                    | 28.6%                |
| Black                 | 1.5%  | 1.7%                    | 0%                   |
| Asian                 | 1.5%  | 1.7%                    | 0%                   |
| Other                 | 4.5%  | 5.0%                    | 0%                   |
| Smoking History       |       |                         |                      |
| Never smoker          | 42.6% | 45.5%                   | 16.7%                |
| Former smoker         | 52.5% | 49.1%                   | 83.3%                |
| Current smoker        | 4.9%  | 5.5%                    | 0%                   |
| Mean pack years       | 29    | 30                      | 24                   |
| Mesothelioma Exposure |       |                         |                      |
| Known exposure        | 73.5% | 71.4%                   | 83.3%                |
| Subtype               |       |                         |                      |
| Epithelioid           | 82.6% | 82.2%                   | 85.7%                |
| Sarcomatoid           | 8.7%  | 8.1%                    | 14.3%                |
| Biphasic              | 8.7%  | 9.7%                    | 0%                   |
| Hemithorax            |       |                         |                      |
| Left                  | 34.4% | 30.9%                   | 66.7%                |
| Right                 | 65.6% | 69.1%                   | 33.3%                |
| Pathologic Stage      |       |                         |                      |
| Stage I               | 45.6% | 41.2%                   | 83.3%                |
| Stage II              | 5.3%  | 5.9%                    | 0%                   |
| Stage III             | 43.9% | 47.1%                   | 16.7%                |
| Stage IV              | 5.3%  | 5.9%                    | 0%                   |
| Overall Survival      |       |                         |                      |
| Mean (months)         | 18.2  | 17.7                    | 22.4                 |
| Median (months)       | 12.0  | 12.5                    | 11.0                 |
